# Supplementary material
Source: publisher site journal article supplement (https://www.dovepress.com/article/225010)
Supplement: Supplementary file 1 [file get_supplementary_file.php]

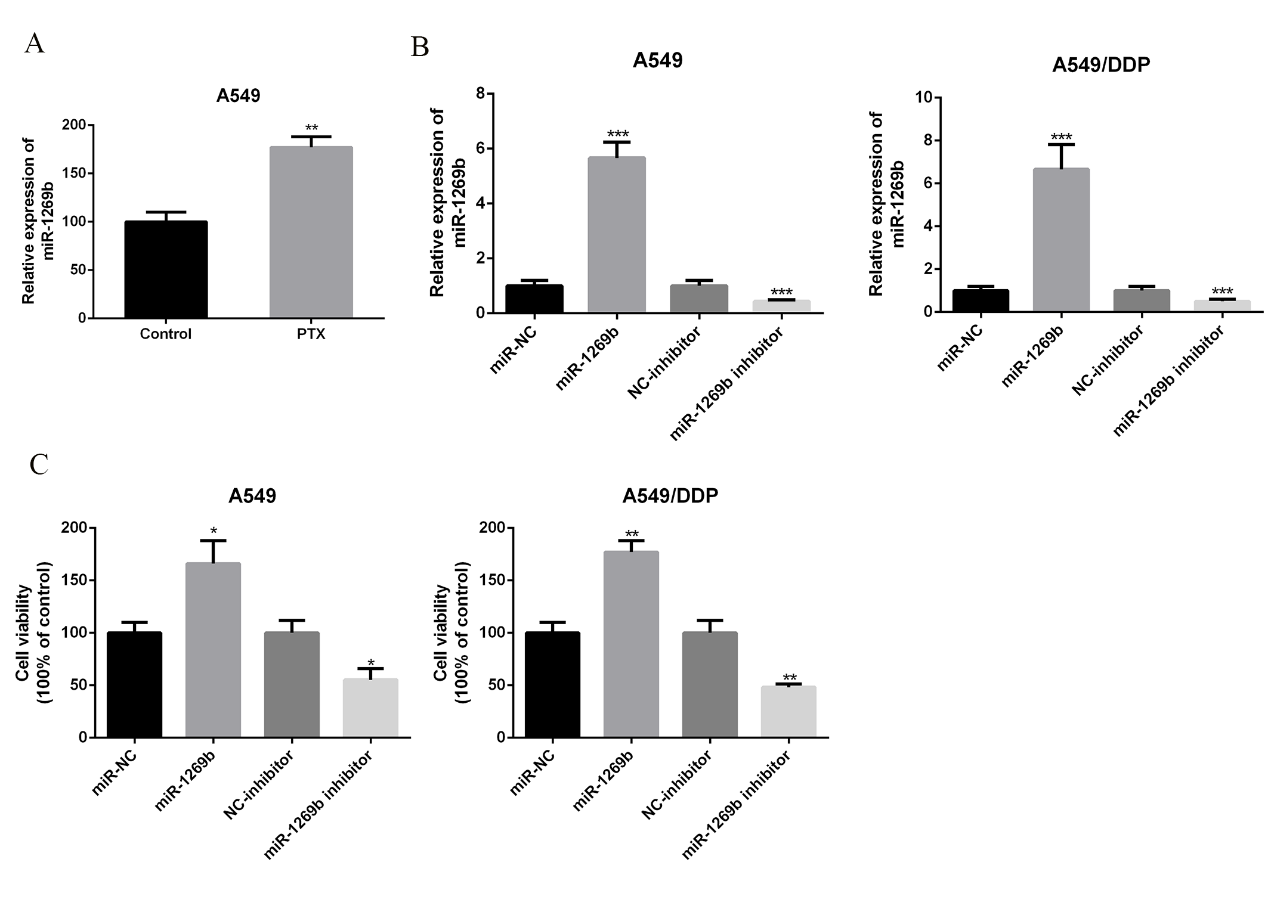


**Figure S1.** (A) Real-time qPCR analysis of the expression levels of miR-1269b in A549 cells after treated with PTX for 72 h. (B) Real-time qPCR analysis of the expression levels of miR-1269b in A549 cells or A549/DDP cells after treated with miR-1269 mimics and miR-1269 inhibitor. (C) MTT assay of cell viability of A549 cells or A549/DDP cells after treated with miR-1269 mimics and miR-1269 inhibitor. * *p* < 0.05, ** *p* < 0.01 and *** *p* < 0.001 compared to relative control.
